# Supplementary material for: Test–Retest Reliability of Isokinetic Strength in Lower Limbs under Single and Dual Task Conditions in Women with Fibromyalgia
Source: MDPI journal article supplement (doi:10.3390/jcm13051288), 2024-02-24
Supplement: s1 [file s1]

SUPPLEMENTARY MATERIAL

**Table S1.** Correlation between the performance obtained in the isokinetic test under single and dual-task conditions in test and retest, FIQR and years of fibromyalgia symptomatology.

| Variables |                              |                         | FIQR   | Years with Fibromyalgia |
|-----------|------------------------------|-------------------------|--------|-------------------------|
| Single    | Knee Extension Max. (test)   | Correlation coefficient | 0.091  | -0.185                  |
|           |                              | <i>p</i> -value         | 0.803  | 0.634                   |
|           | Knee Extension Max. (retest) | Correlation coefficient | 0.406  | -0.101                  |
|           |                              | <i>p</i> -value         | 0.244  | 0.796                   |
|           | Knee Extension Avg. (test)   | Correlation coefficient | 0.067  | -0.126                  |
|           |                              | <i>p</i> -value         | 0.855  | 0.747                   |
|           | Knee Extension Avg. (retest) | Correlation coefficient | 0.418  | -0.067                  |
|           |                              | <i>p</i> -value         | 0.229  | 0.864                   |
|           | Knee Flexion Max. (test)     | Correlation coefficient | -0.030 | -0.521                  |
|           |                              | <i>p</i> -value         | 0.934  | 0.150                   |
|           | Knee Flexion Max. (retest)   | Correlation coefficient | 0.164  | -0.148                  |
|           |                              | <i>p</i> -value         | 0.650  | 0.705                   |
|           | Knee Flexion Avg. (test)     | Correlation coefficient | -0.006 | -0.588                  |
|           |                              | <i>p</i> -value         | 0.987  | 0.096                   |
|           | Knee Flexion Avg. (retest)   | Correlation coefficient | 0.212  | -0.252                  |
|           |                              | <i>p</i> -value         | 0.556  | 0.513                   |
| Dual-Task | Knee Extension Max. (test)   | Correlation coefficient | 0.285  | -0.042                  |
|           |                              | <i>p</i> -value         | 0.425  | 0.915                   |
|           | Knee Extension Max. (retest) | Correlation coefficient | 0.345  | -0.092                  |
|           |                              | <i>p</i> -value         | 0.328  | 0.813                   |
|           | Knee Extension Avg. (test)   | Correlation coefficient | 0.248  | -0.067                  |
|           |                              | <i>p</i> -value         | 0.489  | 0.864                   |
|           | Knee Extension Avg. (retest) | Correlation coefficient | 0.491  | 0.067                   |
|           |                              | <i>p</i> -value         | 0.150  | 0.864                   |
|           | Knee Flexion Max. (test)     | Correlation coefficient | 0.127  | -0.185                  |
|           |                              | <i>p</i> -value         | 0.726  | 0.634                   |
|           | Knee Flexion Max. (retest)   | Correlation coefficient | 0.321  | -0.218                  |
|           |                              | <i>p</i> -value         | 0.365  | 0.572                   |
|           | Knee Flexion Avg. (test)     | Correlation coefficient | 0.248  | -0.076                  |
|           |                              | <i>p</i> -value         | 0.489  | 0.847                   |
|           | Knee Flexion Avg. (retest)   | Correlation coefficient | 0.067  | -0.210                  |
|           |                              | <i>p</i> -value         | 0.855  | 0.587                   |

Abbreviations: FIQR, fibromyalgia impact questionnaire revised; Max, Maximum; Avg, Average.
